# Supplementary material for: Incidence and awareness of dysphoric milk ejection reflex (DMER)
Source: publisher site journal article supplement (doi:10.1515/jpm-2024-0299), 2024-11-30
Supplement: Supplementary file 1 [file j_jpm-2024-0299_suppl_001.pdf]

# Breastfeeding Survey

Please complete the survey below.

Thank you!

Please answer the below for one breastfeeding experience in the morning, at noon, and at nighttime every day for one week. Indicate the date and time of the breastfeeding experience below.

1) Date

2) Time

With my most recent breastfeeding experience, immediately before milk letdown, I started experiencing: (note: you were not feeling this way before breastfeeding)

|                     | None                  | Very mild             | Mild                  | Moderate              | Severe                |
|---------------------|-----------------------|-----------------------|-----------------------|-----------------------|-----------------------|
| 3) Aggression       | <input type="radio"/> |
| 4) Agitation        | <input type="radio"/> |
| 5) Anger            | <input type="radio"/> |
| 6) Annoyance        | <input type="radio"/> |
| 7) Anxiety          | <input type="radio"/> |
| 8) Confusion        | <input type="radio"/> |
| 9) Depression       | <input type="radio"/> |
| 10) Distress        | <input type="radio"/> |
| 11) Fear            | <input type="radio"/> |
| 12) Frustration     | <input type="radio"/> |
| 13) Guilt           | <input type="radio"/> |
| 14) Impatience      | <input type="radio"/> |
| 15) Nausea/Vomiting | <input type="radio"/> |
| 16) Oversensitivity | <input type="radio"/> |
| 17) Panic           | <input type="radio"/> |
| 18) Paranoia        | <input type="radio"/> |
| 19) Pit in stomach  | <input type="radio"/> |
| 20) Restlessness    | <input type="radio"/> |
| 21) Sadness         | <input type="radio"/> |
| 22) Tenseness       | <input type="radio"/> |
| 23) Worthlessness   | <input type="radio"/> |

24) The negative symptoms went away on their own within 5 minutes of milk letdown and I returned to my baseline emotional and physical state.

☐ Yes

☐ No

☐ Not applicable
